# Supplementary material for: Formation and evolution of the unexpected PbI2 phase at the interface during the growth of evaporated perovskite films
Source: Royal Society of Chemistry journal article supplement (doi:10.1039/c6cp02737g), 2016-01-01
Supplement: c6cp02737g1.pdf [file c6cp02737g1.pdf]

**Electronic Supplementary Information (ESI) for**  
**Formation and evolution of the unexpected  $\text{PbI}_2$  phase at**  
**interface during the growth of evaporated perovskite films**

Haitao Xu<sup>a</sup>, Yanglin Wu<sup>a</sup>, Jian Cui<sup>b</sup>, Chaowei Ni<sup>a</sup>, Fuzong Xu<sup>a</sup>, Jiang Cai<sup>a</sup>, Feng Hong<sup>c</sup>, Zebo Fang<sup>a</sup>, Wenzhen Wang<sup>a</sup>, Jiabin Zhu<sup>c,d</sup>, Linjun Wang<sup>\*a</sup>, Run Xu<sup>\*a</sup> and Fei Xu<sup>\*c,d</sup>

a School of Materials Science and Engineering, Shanghai University, 99 Shangda Road, Shanghai 200444, China

b Frontier Institute of Science and Technology, Xi'an Jiaotong University, 99 Yanxiang Road, Xi'an 710054, China

c SHU-Solar E R&D Lab, Department of Physics, Shanghai Key Laboratory of High Temperature Superconductors, Shanghai University, 99 Shangda Road, Shanghai 200444, China

d State Key Laboratory of Surface Physics and of Micro and Nano Photonic Structure (Ministry of Education), Fudan University, 220 Handan Road, Shanghai 200433, China

\* Corresponding Authors; Email: [ljwang@shu.edu.cn](mailto:ljwang@shu.edu.cn); [runxu@staff.shu.edu.cn](mailto:runxu@staff.shu.edu.cn); [feixu@staff.shu.edu.cn](mailto:feixu@staff.shu.edu.cn)

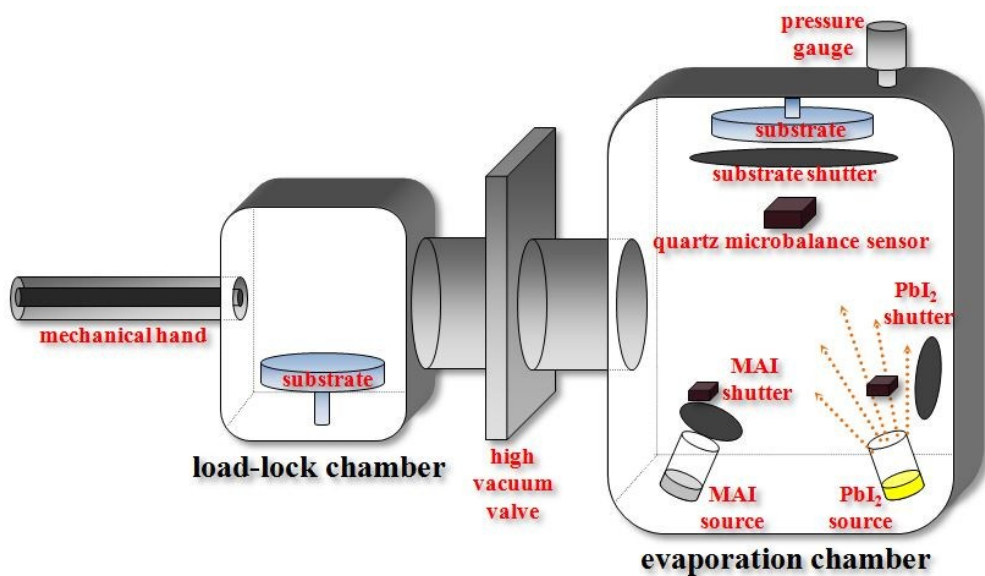

**Fig. S1** Schematic diagram of dual-source evaporation system.

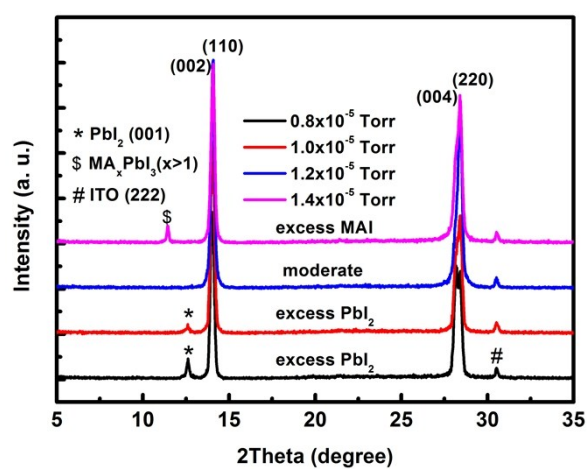

**Fig. S2** X-ray diffraction patterns of perovskite films deposited under different MAI partial pressure.

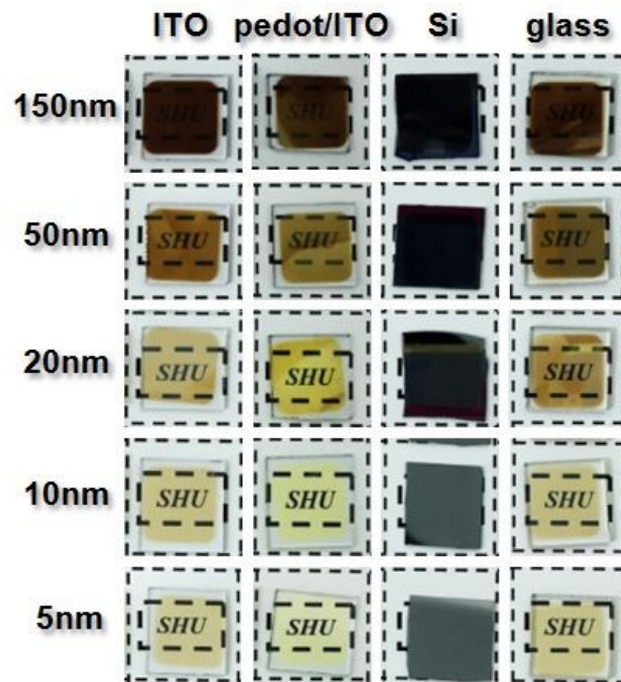

**Fig. S3** Images of the perovskite films with different thickness deposited on different substrates.

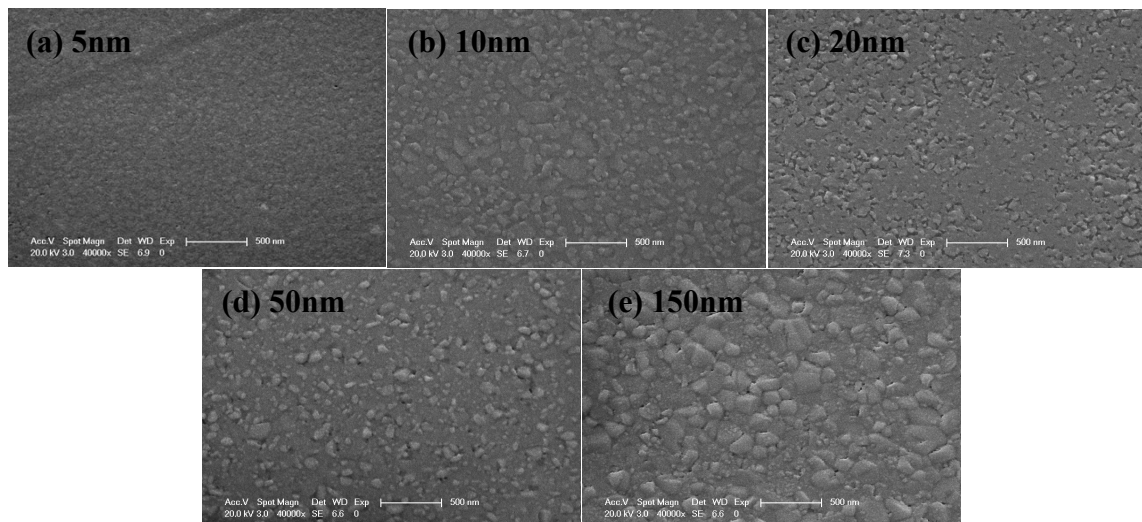

**Fig. S4** Surface SEM images of perovskite films with different thickness deposited on ITO substrates. The scale bar is 500 nm.

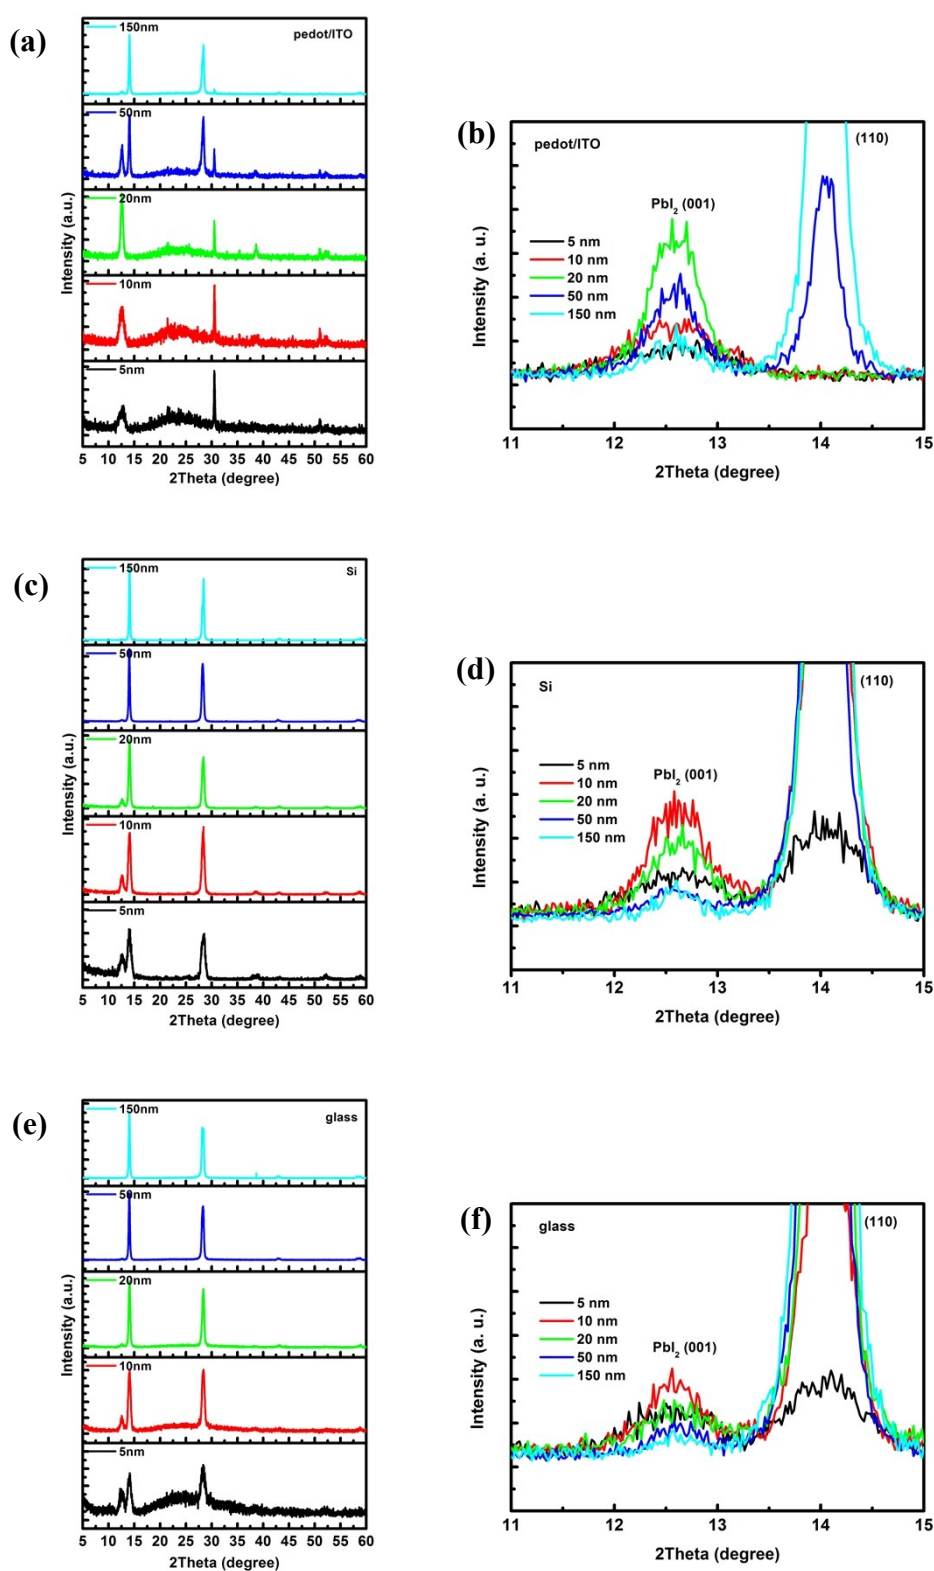

**Fig. S5** X-ray diffraction patterns of perovskite films with different thickness deposited on (a) pedot/ITO, (c) Si and (e) glass substrates. X-ray diffraction patterns of the peak of  $\text{PbI}_2$  (001) planes in perovskite films with different thickness deposited on (b) pedot/ITO, (d) Si and (f) glass substrates.

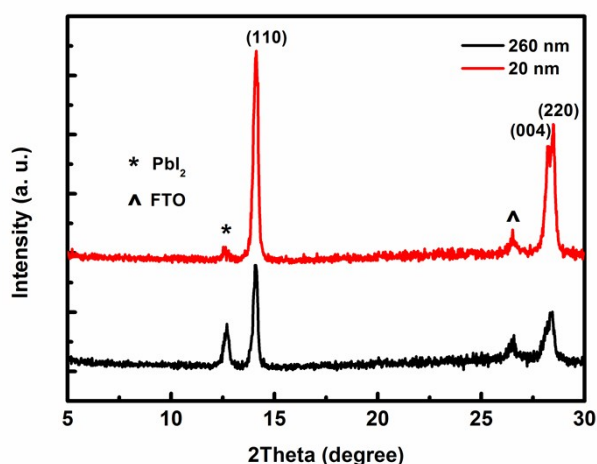

**Fig. S6** X-ray diffraction patterns of perovskite films with thickness of 20 nm and 260 nm deposited on FTO/TiO<sub>2</sub>/PCBM substrates.

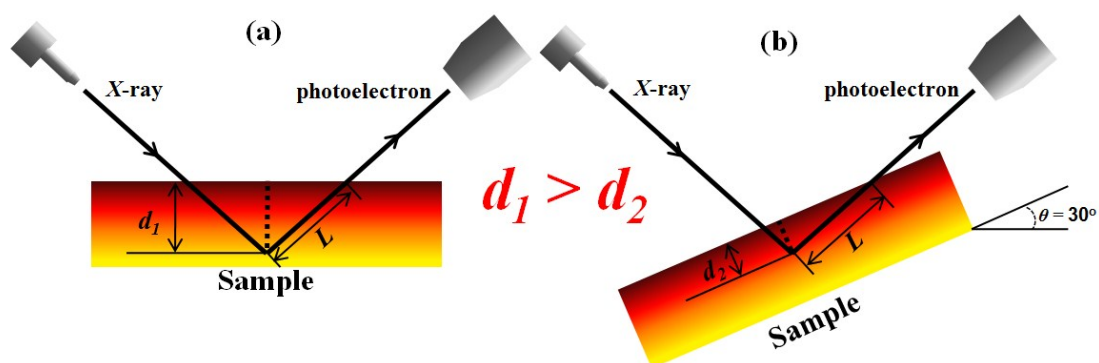

**Fig. S7** The principle diagrams of XPS measurements under two different take-off angles. (a) normal take-off angle. (b) 30° take-off angle.

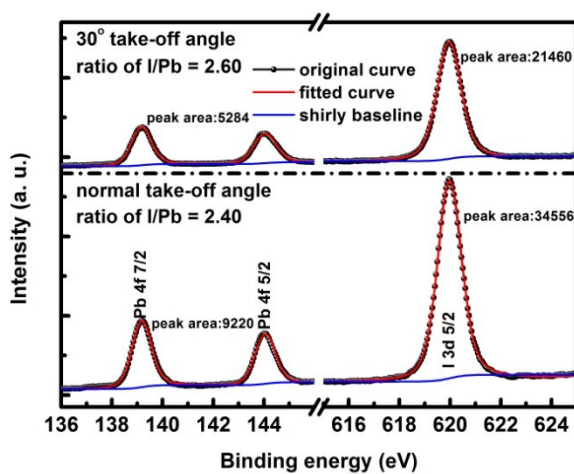

**Fig. S8** High resolution XPS core level spectra of Pb 4f and I 3d 5/2 of the 10 nm-thick perovskite films under different take-off angle measurements. The bottom is under normal take-off angle and the top is under 30° take-off angle.

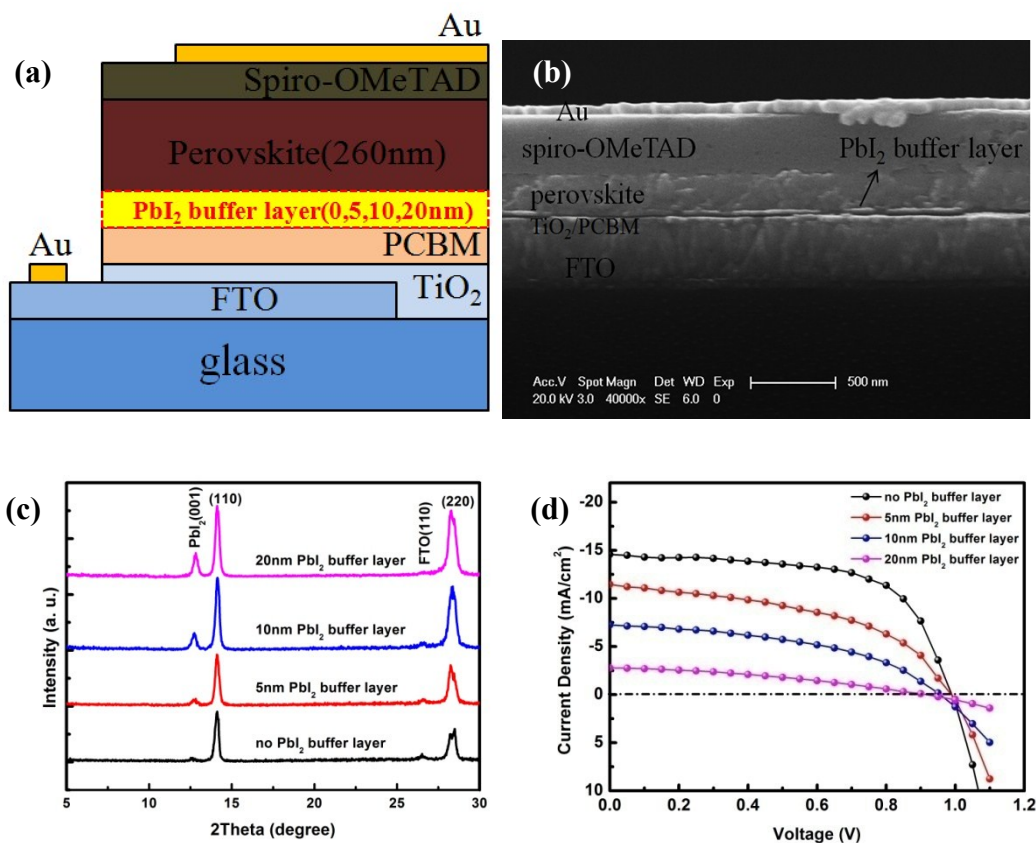

**Fig. S9** (a) Device structure of designed perovskite solar cells (PSCs) to study the effect of  $\text{PbI}_2$  phase at interface on device performance, a deliberately grown  $\text{PbI}_2$  buffer layer with different thickness of 0, 5, 10, 20 nm was deposited on the FTO/ $\text{TiO}_2$ /PCBM substrates. (b) Cross-sectional SEM image of PSCs with a 20 nm-thick  $\text{PbI}_2$  buffer layer. (c) XRD patterns of the perovskite films deposited on  $\text{PbI}_2$  buffer layer with different thickness. (d) Current-density/voltage curves of the corresponding PSCs.

**Table S1** Performance of most vacuum-based PSCs and solution-based PSCs with similar structure and source material to vacuum-based PSCs, which can be used to compare.

| perovskite processing |                        | source material        | HTL               | ETL              | $V_{oc}$<br>(V) | $J_{sc}$<br>(mA/cm <sup>2</sup> ) | FF<br>(%) | PCE<br>(%)   | ref |
|-----------------------|------------------------|------------------------|-------------------|------------------|-----------------|-----------------------------------|-----------|--------------|-----|
| vacuum                | solution               |                        |                   |                  |                 |                                   |           |              |     |
| coevaporation         | /                      | PbI <sub>2</sub> +MAI  | PEDOT:PSS/PolyTPD | PCBM             | 1.05            | 16.12                             | 67        | <b>12.04</b> | 1   |
| coevaporation         | /                      | PbI <sub>2</sub> +MAI  | PEDOT:PSS/PolyTPD | PCBM             | 1.07            | 18.8                              | 63        | <b>12.7</b>  | 2   |
| coevaporation         | /                      | PbI <sub>2</sub> +MAI  | PEDOT:PSS/PolyTPD | PCBM             | 1.05            | 15.88                             | 46        | <b>7.73</b>  | 3   |
| coevaporation         | /                      | PbI <sub>2</sub> +MAI  | PEDOT:PSS/PolyTPD | PCBM             | 1.04            | 17.6                              | 62        | <b>11.4</b>  | 4   |
| coevaporation         |                        | PbI <sub>2</sub> +MAI  | PEDOT:PSS/PCDTBT  | PCBM/<br>LiF     | 1.05            | 21.9                              | 72        | <b>16.5</b>  | 5   |
| coevaporation         | /                      | PbI <sub>2</sub> +MAI  | spiro-MeOTAD      | TiO <sub>2</sub> | 1.1             | 18                                | 70        | <b>13</b>    | 6   |
| coevaporation         | /                      | PbCl <sub>2</sub> +MAI | PEDOT:PSS         | PCBM             | 0.97            | 17.3                              | 63        | <b>10.5</b>  | 7   |
| coevaporation         | /                      | PbCl <sub>2</sub> +MAI | spiro-MeOTAD      | C60              | 0.78            | 14.4                              | 69        | <b>7.8</b>   | 8   |
| coevaporation         | /                      | PbCl <sub>2</sub> +MAI | NiO               | PCBM             | 0.79            | 14.2                              | 65        | <b>7.26</b>  | 9   |
| coevaporation         | /                      | PbCl <sub>2</sub> +MAI | spiro-MeOTAD      | TiO <sub>2</sub> | 1.07            | 21.5                              | 68        | <b>15.4</b>  | 10  |
| hybrid deposition     | /                      | PbCl <sub>2</sub> +MAI | spiro-MeOTAD      | TiO <sub>2</sub> | 1.09            | 17                                | 54        | <b>9.9</b>   | 11  |
| hybrid deposition     | /                      | PbCl <sub>2</sub> +MAI | spiro-MeOTAD      | TiO <sub>2</sub> | 1.01            | 12.82                             | 66.       | <b>8.64</b>  | 12  |
| /                     | one-step               | PbCl <sub>2</sub> +MAI | spiro-MeOTAD      | TiO <sub>2</sub> | 1.13            | 22.75                             | 75        | <b>19.3</b>  | 13  |
| /                     | one-step (moisture)    | PbCl <sub>2</sub> +MAI | PEDOT:PSS         | PCBM/<br>PFN     | 1.05            | 20.3                              | 80.2      | <b>17.1</b>  | 14  |
| /                     | one-step               | PbI <sub>2</sub> +MAI  | PEDOT:PSS         | PCBM             | 1.1             | 20.9                              | 79        | <b>18.2</b>  | 15  |
| /                     | one-step (hot-casting) | PbI <sub>2</sub> +MAI  | PEDOT:PSS         | PCBM             | 0.94            | 22.4                              | 83        | <b>17.4</b>  | 16  |
| /                     | one-step               | PbI <sub>2</sub> +MAI  | PEDOT:PSS         | PCBM             | 0.89            | 18.85                             | 80        | <b>13.37</b> | 17  |
| /                     | solvent engineering    | PbI <sub>2</sub> +MAI  | NiO               | PCBM             | 1.06            | 20.2                              | 81.3      | <b>17.3</b>  | 18  |

## References

- 1 O. Malinkiewicz, A. Yella, Y. H. Lee, G. M. Espallargas, M. Grätzel, M. K. Nazeeruddin and H. J. Bolink, *Nat. Photonics* 2014, **8**, 128-132.
- 2 C. Momblona, O. Malinkiewicz, C. Roldán-Carmona, A. Soriano, L. Gil-Escrig, E. Bandiello, M. Scheepers, E. Edri and H. J. Bolink, *APL Mater.* 2014, **2**, 081504.
- 3 C. Roldán-Carmona, O. Malinkiewicz, R. Betancur, G. Longo, C. Momblona, F. Jaramillo, L. Camacho and H. J. Bolink, *Energy Environ. Sci.*, 2014, **7**, 2968-2973.
- 4 O. Malinkiewicz, C. Roldán-Carmona, A. Soriano, L. Camacho, M. K. Nazeeruddin and H. J. Bolink, *Adv. Energy Mater.* 2014, **4**, 1400345.
- 5 Q. Lin, A. Armin, R. C. R. Nagiri, P. L. Burn and P. Meredith, *Nat. Photonics* 2015, **9**, 106–112.
- 6 J. Teuscher, A. Ulianov, O. Muntener, M. Grätzel and N. Tetreault, *Chem. Sus. Chem.* 2015, **8**, 3847-3852.
- 7 C. Gao, J. Liu, C. Liao, Q. Ye, Y. Zhang, X. He, X. Guo, J. Mei and W. Lau, *RSC Adv.* 2015, **5**, 26175-26180.
- 8 L. E. Polander, P. Pahner, M. Schwarze, M. Saalfrank, C. Koerner and K. Leo, *APL Mater.* 2014, **2**, 081503.
- 9 A. S. Subbiah, A. Halder, S. Ghosh, N. Mahuli, G. Hodes and S. K. Sarkar, *J. Phys. Chem. Lett.* 2014, **5**, 1748-1753.
- 10 M. Liu, M. B. Johnston and H. J. Snaith, *Nature* 2013, **501**, 395-398.
- 11 L. K. Ono, S. Wang, Y. Kato, S. R. Raga and Y. Qi, *Energy Environ. Sci.* 2014, **7**, 3989-3993.
- 12 S. Wang, L. K. Ono, M. R. Leyden, Y. Kato, S. R. Raga, M. V. Lee and Y. Qi, *J. Mater. Chem. A* 2015, **3**, 14631-14641.
- 13 H. Zhou, Q. Chen, G. Li, S. Luo, T.-b. Song, H.-S. Duan, Z. Hong, J. You, Y. Liu and Y. Yang, *Science* 2014, **345**, 542-546.
- 14 J. You, Y. Yang, Z. Hong, T. B. Song, L. Meng, Y. Liu, C. Jiang, H. Zhou, W. H. Chang, G. Li and Y. Yang, *Appl. Phys. Lett.* 2014, **105**, 183902.
- 15 J. H. Heo, H. J. Han, D. Kim, T. K. Ahn and S. H. Im, *Energy Environ. Sci.* 2015, **8**, 1602-1608.
- 16 W. Nie, H. Tsai, R. Asadpour, J. Blancon, A. J. Neukirch, G. Gupta, J. J. Crochet, M. Chhowalla, S. Tretiak, M. A. Alam, H. L. Wang and A. D. Mohite, *Science* 2015, **347**, 522-525.
- 17 P. W. Liang, C. C. Chueh, S. T. Williams and A. K.-Y. Jen, *Adv. Energy Mater.* 2015, **5**, 1402321.
- 18 J. H. Park, J. Seo, S. Park, S. S. Shin, Y. C. Kim, N. J. Jeon, H.-W. Shin, K. Ahn, J. H. Noh, S. C. Yoon, C. S. Hwang, S. I. Seok, *Adv. Mater.* 2015, **27**, 4013–4019.
